# Supplementary material
Source: PubMed Central journal article supplement (PMC6215509)
Supplement: NIHMS986510-supplement-Supp_FigS2.pdf [file NIHMS986510-supplement-Supp_FigS2.pdf]

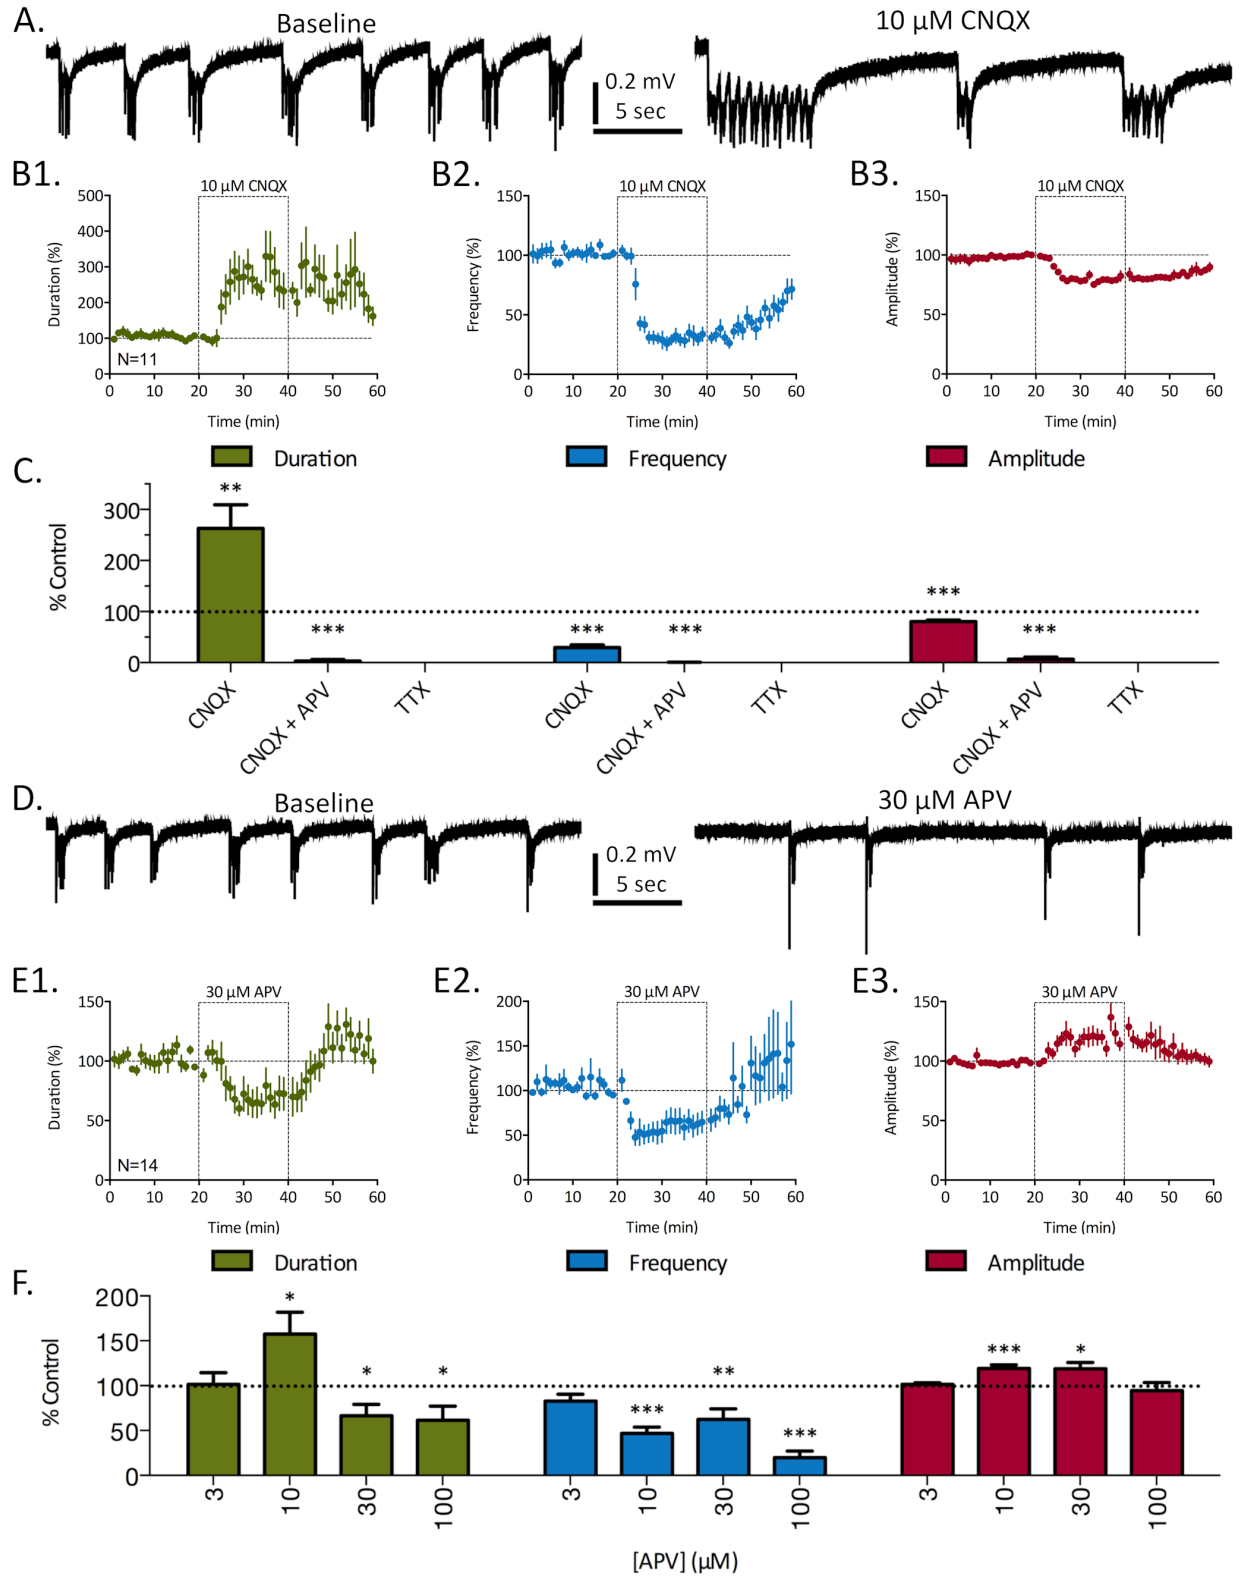

**Figure S2:** Glutamate receptor antagonists fail to fully inhibit REDs. A) Representative traces of REDs recorded before (baseline) and in the presence of 10  $\mu\text{M}$  CNQX. B) Time courses for 10  $\mu\text{M}$  CNQX's effects of RED duration (B1, green), frequency (B2, blue), and amplitude (B3, red).

Dashed-line boxes from 20 to 40 minutes represent the duration of CNQX exposure. Data points represent mean  $\pm$  SEM for RED parameters in 1-minute bins. C) Bar graph representing the effects of CNQX (10  $\mu$ M), CNQX (10  $\mu$ M) + APV (50  $\mu$ M), and TTX (1  $\mu$ M) on RED duration (green), frequency (blue), and amplitude (red). D) Representative traces of REDs recorded before (baseline) and in the presence of 30  $\mu$ M APV. E) Time courses for 30  $\mu$ M APV's effects of RED duration (E1, green), frequency (E2, blue), and amplitude (E3, red). Dashed-line boxes from 20 to 40 minutes represent the duration of APV exposure. Data points represent mean  $\pm$  SEM for RED parameters in 1-minute bins. F) Concentration-dependent effects of APV on RED duration (green), frequency (blue), and amplitude (red). In all bar graphs, error bars represent SEM and \* =  $p < 0.05$ , \*\* =  $p < 0.01$ , \*\*\* =  $p < 0.001$ .

### 3 Results

#### 3.1 AMPA/Kainate and NMDA receptor antagonists differentially affect REDs

First, we examined the effects of 10  $\mu$ M CNQX on RED duration, frequency, and amplitude. As illustrated in Figure S2 panels A-B, 10  $\mu$ M CNQX failed to completely block REDs in these slices. Instead, in 11 slices, CNQX significantly increased burst duration ( $263.0 \pm 46.4\%$  of baseline,  $p = 0.0056$ ) and decreased burst frequency and amplitude ( $29.3 \pm 5.5\%$  of baseline,  $p < 0.0001$ , and  $80.2 \pm 3.0\%$  of baseline,  $p < 0.0001$ , respectively). Since these data indicated that REDs may be additionally mediated by NMDA receptors under our experimental conditions, we assessed a combination of 10  $\mu$ M CNQX and 50  $\mu$ M APV. A 20-minute bath exchange with this combination of antagonists effectively eliminated REDs (Figure S2 panel C: duration:  $3.3 \pm 3.0\%$ ,  $p < 0.0001$ ; frequency:  $0.6 \pm 0.4\%$ ,  $p < 0.0001$ ; amplitude:  $6.5 \pm 4.3\%$ ,  $p < 0.0001$ , with respect to baseline,  $N = 9$ ). Finally, a 20-minute bath exchange with 1  $\mu$ M TTX completely, and irreversibly, eliminated all REDs (Figure S2 panel C: all parameters:  $0 \pm 0\%$  of baseline,  $N = 3$ ).

The role(s) of NMDA receptor mediated synaptic transmission in mediating REDs were further examined by evaluating the concentration-dependent effects of the NMDA receptor selective antagonist, APV, alone on REDs (Figure S2 panels D-F). Unlike a previous report showing a complete block of REDs in a low- $Mg^{2+}$  based model using brain slices from naïve rats at 20-30  $\mu$ M<sup>8</sup>, APV (3-100  $\mu$ M) failed to completely block REDs in mEC slices obtained from our KA-rats. At the highest concentration tested here (100  $\mu$ M,  $N = 9$ ), APV significantly, but incompletely, attenuated both RED duration and frequency ( $61.4 \pm 15.7\%$ ,  $p = 0.0489$  and  $19.8 \pm 7.3\%$ ,  $p < 0.0001$ , respectively). Interestingly, APV's concentration-dependent effects on RED duration were biphasic; at 10  $\mu$ M, APV significantly increased burst duration in a manner similar to 10  $\mu$ M CNQX ( $157.5 \pm 24.2\%$  of baseline,  $p = 0.0323$ ,  $N = 15$ ).
